# Supplementary material for: Hypoxia — a key regulatory factor in tumour growth
Source: Springer Nature journal article supplement (doi:10.1038/nrc704), 2002-01-01
Supplement: 41568_2002_BFnrc704_MOESM1_ESM.pdf [file 41568_2002_BFnrc704_MOESM1_ESM.pdf]

Online Table 1 | Imaging hypoxia

| Imaging technique ( <i>in vivo</i> )                                                              | What it shows                            | References |
|---------------------------------------------------------------------------------------------------|------------------------------------------|------------|
| Magnetic resonance imaging with integrin ligands                                                  | Activated blood-vessel endothelial cells | 1          |
| Magnetic resonance imaging                                                                        | Contrast change as measure of blood flow | 2          |
| Positron emission tomography (PET) scanning with <sup>18</sup> F-labelled hypoxia-activated drugs | Hypoxic areas                            | 3,4        |
| Radio-labelled hypoxia-activated bioreductive drugs                                               | Hypoxic areas                            | 5          |
| PET-labelled carbon monoxide and water                                                            | Blood flow                               |            |
| Scanning with antibody to vascular endothelial growth factor (VEGF)                               | VEGF-producing cells                     |            |
| Annexin V <sup>99m</sup> Tc (technetium) Direct measurement                                       | Binds apoptotic cells                    | 6          |
| Oxygen electrode                                                                                  | O <sub>2</sub> concentration             |            |
| Luminescent fibre optics In biopsies                                                              | O <sub>2</sub> concentration             | 7          |
| Pimonidazole or EF5 injection before biopsy and immunohistochemistry of tumours                   | Staining of hypoxic cells                | 8,9        |
| Staining for hypoxia-induced genes                                                                | CA9, GLUT1, HIF-1 expression             | 10         |
| Assays for DNA strand breaks (comets) after radiation treatment                                   | Hypoxic areas                            | 11         |
| Measurement of tumour vascularity                                                                 | Inter-capillary distance                 | 12         |
| Plasma assays                                                                                     | Secreted hypoxia-regulated proteins      | 13         |

- Sipkins, D. A. *et al.* Detection of tumor angiogenesis *in vivo* by  $\alpha(v)\beta(3)$ -targeted magnetic-resonance-imaging. *Nature Med.* **4**, 623–626 (1998).
- Cooper, R. A. *et al.* Tumour oxygenation levels correlate with dynamic contrast-enhanced magnetic resonance imaging parameters in carcinoma of the cervix. *Radiother. Oncol.* **57**, 53–59 (2000).
- Lewis, J. S. & Welch, M. J. PET imaging of hypoxia. *J. Nucl. Med. Allied Sci.* **45**, 183–188 (2001).
- Aboagye, E. O., Kelson, A. B., Tracy, M. & Workman, P. Preclinical development and current status of the fluorinated 2-nitroimidazole hypoxia probe *N*-(2-hydroxy-3,3,3-trifluoropropyl)-2-(2-nitro-1-imidazolyl) acetamide (SR 4554, CRC 94/17): a non-invasive diagnostic probe for the measurement of tumor hypoxia by magnetic resonance spectroscopy and imaging, and by positron emission tomography. *Anticancer Drug Des.* **13**, 703–730 (1998).
- Slim, B. G., Laux, W. T., Rutland, M. D., Palmer, B. N. & Wilson, W. R. Scintigraphic imaging of the hypoxia marker <sup>99m</sup>technetium-labeled 2,2'-(1,4-diaminobutane)bis(2-methyl-3-butanone) dioxime (<sup>99m</sup>Tc-labeled HL-91; prognox): noninvasive detection of tumor response to the anti-vascular agent 5,6-dimethylxanthenone-4-acetic acid. *Cancer Res.* **60**, 4582–4588 (2000).
- D'Arceuil, H. *et al.* <sup>99m</sup>Tc annexin V imaging of neonatal hypoxic brain injury. *Stroke* **31**, 2692–2700 (2000).
- Seddon, B. M., Honess, D. J., Vojnovic, B., Tozer, G. M. & Workman, P. Measurement of tumor oxygenation: *in vivo* comparison of a luminescence fiber-optic sensor and a polarographic electrode in the p22 tumor. *Radiat. Res.* **155**, 837–846 (2001).
- Nordmark, M. *et al.* Invasive oxygen measurements and pimonidazole labeling in human cervix carcinoma. *Int. J. Radiat. Oncol. Biol. Phys.* **49**, 581–586 (2001).
- Dolbier, W. R. Jr, Li, A. R., Koch, C. J., Shiu, C. Y. & Kachur, A. V. [<sup>18</sup>F]-EF5, a marker for PET detection of hypoxia: synthesis of precursor and a new fluorination procedure. *Appl. Radiat. Isotopes* **54**, 73–80 (2001).
- Chia, S. K. *et al.* Prognostic significance of a novel hypoxia-regulated marker, carbonic anhydrase IX, in invasive breast carcinoma. *J. Clin. Oncol.* **19**, 3660–3668 (2001).
- Olive, P. L., Durand, R. E., Raleigh, J. A., Luo, C. & Aquino-Parsons, C. Comparison between the comet assay and pimonidazole binding for measuring tumour hypoxia. *Br. J. Cancer* **83**, 1525–1531 (2000).
- West, C. M. L., Cooper, R. A., Lancaster, J. A., Wilks, D. P. & Bromley, M. Tumor vascularity: a histological measure of angiogenesis and hypoxia. *Cancer Res.* **61**, 2907–2910 (2001).
- Koong, A. C. *et al.* Candidate genes for the hypoxic tumor phenotype. *Cancer Res.* **60**, 883–887 (2000).
